# Supplementary material
Source: MDPI journal article supplement (https://www.mdpi.com/2409-515X/6/3/66)
Supplement: s1 [file s1]

## **Supplemental Material**

**Item 1.** *The Krabbe Newborn Screening - Family Perspective Survey*

**Item 2.** All family comments

# Krabbe Newborn Screening - Family Perspective Survey

This anonymous survey is for parents and/or individuals affected by Krabbe Disease via a positive Newborn Screen, or symptomatic diagnosis with the disease. Your participation in this survey will be used in a patient perspective article for a medical journal to help providers understand affected families' experience and perspective. If you have more than one child affected by Krabbe Disease please complete the survey for each child.

\* Required

Relationship to the individual affected by Krabbe Disease: \*

- ☐ Self
- ☐ Mother
- ☐ Father
- ☐ Legal Guardian
- ☐ Grandparent
- ☐ Sibling
- ☐ Other:

If other, please specify:

Your answer

In what year was your child born? \*

Your answer

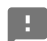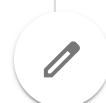

If deceased, please include the year of their death:

Your answer

What country was your child born in? \*

Your answer

If in the United States, what city and state were they born in? \*

Your answer

How did you learn your child may be affected by Krabbe Disease? \*

- ☐ Through my state's newborn screening program
- ☐ At (or before birth) due to having an older sibling affected by Krabbe Disease
- ☐ Due to symptoms of the disease (not through newborn screening or carrier screening).
- ☐ Other:

If your child has been diagnosed with Krabbe disease, what type does your child have? \*

Choose ▼

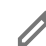

If your child has been found to test positive for Krabbe disease by the state newborn screening laboratory, what did the follow-up professionals tell you?

Choose ▼

From your answer to the above question, how old was your child when you received this information from the follow-up professionals?

Your answer

Was your child eligible to receive a cord blood/bone marrow transplant to alter the effect of the disease? \*

☐ Yes

☐ No

Did your child receive a cord blood/bone marrow transplant? \*

☐ Yes

☐ No

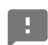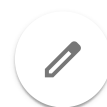

Have you advocated for the addition of Krabbe Disease in your state's NBS program (either in the state your child was born or the state in which you currently reside)? \*

☐ Yes

☐ No

Do you believe newborn screening for Krabbe Disease should be implemented in every state \*

☐ Yes

☐ No

In your own words, please explain your response to the previous question: \*

Your answer

Additional Comments (If you would like to elaborate on any of your answers or feel there are relevant issues that were missed by the survey, please include them here):

Your answer

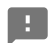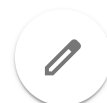

Relationship to the individual affected by Krabbe Disease: \*

- ☐ Self
- ☐ Mother
- ☐ Father
- ☐ Legal Guardian
- ☐ Grandparent
- ☐ Sibling
- ☐ Other:

If other, please specify:

Your answer

In what year was your child born? \*

Your answer

If deceased, please include the year of their death:

Your answer

What country was your child born in? \*

Your answer

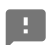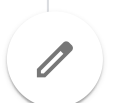

If in the United States, what city and state were they born in? \*

Your answer

How did you learn your child may be affected by Krabbe Disease? \*

- ☐ Through my state's newborn screening program
- ☐ At (or before birth) due to having an older sibling affected by Krabbe Disease
- ☐ Due to symptoms of the disease (not through newborn screening or carrier screening).
- ☐ Other:

If your child has been diagnosed with Krabbe disease, what type does your child have? \*

Choose ▼

If your child has been found to test positive for Krabbe disease by the state newborn screening laboratory, what did the follow-up professionals tell you?

Choose ▼

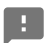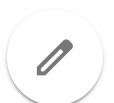

From your answer to the above question, how old was your child when you received this information from the follow-up professionals?

Your answer

Was your child eligible to receive a cord blood/bone marrow transplant to alter the effect of the disease? \*

☐ Yes

☐ No

Did your child receive a cord blood/bone marrow transplant? \*

☐ Yes

☐ No

Have you advocated for the addition of Krabbe Disease in your state's NBS program (either in the state your child was born or the state in which you currently reside)? \*

☐ Yes

☐ No

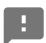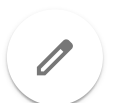



Do you believe newborn screening for Krabbe Disease should be implemented in every state \*

☐ Yes

☐ No

In your own words, please explain your response to the previous question: \*

Your answer

Additional Comments (If you would like to elaborate on any of your answers or feel there are relevant issues that were missed by the survey, please include them here):

Your answer

Submit

Never submit passwords through Google Forms.

This form was created inside of Hunter's Hope Foundation. [Report Abuse](#)

Google Forms

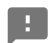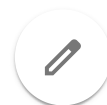

## Survey Comments

### NBS Group

|             |                                                                                                                                                                                                                                                                                                                                                                                                                                                                                                                                                                                                                                                                                                                                                                                                                                                                                                                                                                                                                                                                                                                                                                                                                                                                           |
|-------------|---------------------------------------------------------------------------------------------------------------------------------------------------------------------------------------------------------------------------------------------------------------------------------------------------------------------------------------------------------------------------------------------------------------------------------------------------------------------------------------------------------------------------------------------------------------------------------------------------------------------------------------------------------------------------------------------------------------------------------------------------------------------------------------------------------------------------------------------------------------------------------------------------------------------------------------------------------------------------------------------------------------------------------------------------------------------------------------------------------------------------------------------------------------------------------------------------------------------------------------------------------------------------|
| Awareness   | Awareness And early detection is essential.                                                                                                                                                                                                                                                                                                                                                                                                                                                                                                                                                                                                                                                                                                                                                                                                                                                                                                                                                                                                                                                                                                                                                                                                                               |
| ID Carriers | Our children were flagged as carriers, which will help them make educated decisions about their own children. If they HAD the disease, they would have been able to receive early treatment because of newborn screening.                                                                                                                                                                                                                                                                                                                                                                                                                                                                                                                                                                                                                                                                                                                                                                                                                                                                                                                                                                                                                                                 |
| ID Carriers | If it wasn't for the screening I would have no idea my daughter is a carrier!                                                                                                                                                                                                                                                                                                                                                                                                                                                                                                                                                                                                                                                                                                                                                                                                                                                                                                                                                                                                                                                                                                                                                                                             |
| ID Carriers | My daughter is a carrier for Krabbe disease and my family went back 3 generations of it through genetic testing and are just now finding out. I am grateful for the new born screening because now we have the tools and resources for future generations.                                                                                                                                                                                                                                                                                                                                                                                                                                                                                                                                                                                                                                                                                                                                                                                                                                                                                                                                                                                                                |
| No NBS      | This test took away a lot of joy in the first 3 Months of my child's/family's life for a false positive. For a disease that currently has no cure, this false positive brought extreme sadness, fear, and wrestling with what to do as many people in our lives had opinions on if we should continue testing or not after receiving the initial positive result. We spent a lot of money to receive uncertain results each time with no definitive answers. It wasn't until a random research program was found by our genetic physician that we got results stating that it was a false positive. Had he not found this, or we ran out of money to continue to test, we would be left wondering if our son would die for the rest of his life. My genetic physician did not have his child tested for only this disease on the newborn screen and we see why. The testing is poor and for something so serious, I'm so incredibly disappointed in how this process occurred. I understand the need for more research to find a cure, but the strain financially, emotionally, and mentally was incredibly painful. There just has to be a better way to do this. Especially when hospitals aren't equipped to handle what to do next when a false positive is detected. |
| No NBS      | We had absolutely no answers to any questions. All they could tell us was they don't know when and how it will affect our daughter. We also have a 4 year old that had to be tested and she came up positive as well. Both girls have no symptoms and are very                                                                                                                                                                                                                                                                                                                                                                                                                                                                                                                                                                                                                                                                                                                                                                                                                                                                                                                                                                                                            |

|                           |                                                                                                                                                                                                                                                                                                                                                                                                                                                                                                                                                                                                                                                                                                                                                                                                                                                                                                                                                                                                                                                                                                                                                                              |
|---------------------------|------------------------------------------------------------------------------------------------------------------------------------------------------------------------------------------------------------------------------------------------------------------------------------------------------------------------------------------------------------------------------------------------------------------------------------------------------------------------------------------------------------------------------------------------------------------------------------------------------------------------------------------------------------------------------------------------------------------------------------------------------------------------------------------------------------------------------------------------------------------------------------------------------------------------------------------------------------------------------------------------------------------------------------------------------------------------------------------------------------------------------------------------------------------------------|
|                           | advanced for their age. I honestly wish we never found out. It has done nothing but add stress to our lives.                                                                                                                                                                                                                                                                                                                                                                                                                                                                                                                                                                                                                                                                                                                                                                                                                                                                                                                                                                                                                                                                 |
| Other                     | Newborn screening should be done for Krabbe Disease and serious diseases like it that can be tested for at this age.                                                                                                                                                                                                                                                                                                                                                                                                                                                                                                                                                                                                                                                                                                                                                                                                                                                                                                                                                                                                                                                         |
| Parental Rights/Knowledge | It's very important every mother and child have the opportunity to know head on if their child may be affected , to prevent the heartache                                                                                                                                                                                                                                                                                                                                                                                                                                                                                                                                                                                                                                                                                                                                                                                                                                                                                                                                                                                                                                    |
| Parental Rights/Knowledge | But also parents need to know all the facts about the children that have survived it also. I remember getting all negative but true facts. I was told that my daughter would not survive with her two mutations and high risk. I had faith and now my daughter is 11 no symptoms and doing great. I did speak to her specialist watching her in Rochester and let her know that I would love to meet with any parents near us to help them get through any questions or etc. I feel the parents need that because there is so much about krabbe on internet and docs that did scare me so much and I was in dark about I did basically become a pro on looking up info etc. I would love to help these parents through the process and maybe being involved in the other side of krabbe and give them the faith and courage to go to the hunter hope page to be able to read the scary stuff but still have hope. I feel I would like to give back some of the good I learned to help others. I would love to work with Jill or her mom who I did meet a few times to be that other piece of the puzzle that helps make hunters hope take off even higher and help awareness |

|                    |                                                                                                                                                                                                                                                                                                                                                                                                                                                                                            |
|--------------------|--------------------------------------------------------------------------------------------------------------------------------------------------------------------------------------------------------------------------------------------------------------------------------------------------------------------------------------------------------------------------------------------------------------------------------------------------------------------------------------------|
| Save/Protect Lives | I believe screening should be done for any test which could save a child's life, by knowing ahead of time what they may be facing. We have done several walks and raised thousands of dollars to raise awareness for this horrific disease. We are lucky my son's levels are low enough not be effected by this disease and we are blessed to do all we can to help others.                                                                                                                |
| Save/Protect Lives | I believe every state should protect newborn babies from this potential deadly disease                                                                                                                                                                                                                                                                                                                                                                                                     |
| Save/Protect Lives | I believe that newborn screening provides each child the chance at a life that would otherwise be taken by a fatal and devastating disease. Not to mention the long and suffering complications from it prior to death. I believe that because of newborn screening, my child is alive, attending preschool and thriving today. Each parent deserves to make the decision that is best for them, their child and their family. And each child deserves the chance at life.                 |
| Save/Protect Lives | Krabbe and many leukodystrophies are terrible diseases that cause prolonged suffering for the affected children as well as their families. While Krabbe is rare, when untreated its severe nature is something that no child should ever have to endure. Infants, toddlers, and children should not have to suffer a slow and painful death. Newborn screening saves lives, prevents unnecessary suffering, and provides affected children the chance to experience full and joyful lives. |
| Save/Protect Lives | My daughter is at risk. Knowing the symptoms and following up with doctors will save her life if the disease ever presents itself.                                                                                                                                                                                                                                                                                                                                                         |
| Save/Protect Lives | We lived in a state that didn't test when I had my son but he was born in a state that did test. Not because we knew only because we live right on the state line. Everyday I can't imagine if I would have had my son in Tennessee he would most likely not be with us today.                                                                                                                                                                                                             |

|                        |                                                                                                                                                                                                                                                                                                                                                                        |
|------------------------|------------------------------------------------------------------------------------------------------------------------------------------------------------------------------------------------------------------------------------------------------------------------------------------------------------------------------------------------------------------------|
| Treatment Intervention | If detected on time per my understanding there is chance to help relieve symptoms and to make it less painful for a child                                                                                                                                                                                                                                              |
| Treatment Intervention | Newborn screening in our state led to very early diagnosis which then allowed us to get to Dr. Escolar and her team in Pittsburgh for evaluation and a cord blood transplant which saved our child's life!!!!                                                                                                                                                          |
| Treatment Intervention | The newborn screening detect my son Krabbe disease as soon as 1 week old and he had his first transplant at one month. After two transplant, he can walk and starting to talk like a normal kid. Not all kid will have the same results but if every state had newborn screen, the child and the parents has the option or has better chances of having a normal life. |
| Treatment Intervention | Our child would be deceased or dying eight now if we weren't given the chance to watch him grow up courtesy of dr escolar and bmt team in Pittsburgh                                                                                                                                                                                                                   |
| Treatment Intervention | It should never matter what state or zip code you live in that determines your child's fate! My daughter is proof that the treatment currently available is enough!!                                                                                                                                                                                                   |

### SD Group

|        |                                                                                                                                                                                           |
|--------|-------------------------------------------------------------------------------------------------------------------------------------------------------------------------------------------|
| No NBS | Not unless, it provides a normal life for the child.                                                                                                                                      |
| No NBS | There's no cure, so why test? It does not meet the criteria of "having an acceptable treatment protocol in place that changes the outcome for patients diagnosed early with the disease." |
| No NBS | Today, the screening is very expensive and I believe is not possible apply for all newborn.                                                                                               |
| Other  | Ok                                                                                                                                                                                        |

|       |                                                                                                                                                                                                                                                                                                          |
|-------|----------------------------------------------------------------------------------------------------------------------------------------------------------------------------------------------------------------------------------------------------------------------------------------------------------|
| Other | I am unsure of this answer - I need more information regarding the pros and cons of routine newborn screening. I am not informed regarding, cost of screening, false positive rate, current treatment options, treatment outcomes, etc. and if screening would be for all leukodystrophy or just Krabbe. |
| Other | Yes                                                                                                                                                                                                                                                                                                      |
| Other | We are fighting to add Krabbe to the newborn screening panel in Virginia.                                                                                                                                                                                                                                |
| Other | Every state should test for things such as Krabbe and other leukodystrophies                                                                                                                                                                                                                             |
| Other | Don't know anything about this                                                                                                                                                                                                                                                                           |
| Other | Every country. Would be nice! Wasn't aware of Krabbes, lost a son and a niece shortly after their first birthday.                                                                                                                                                                                        |
| Other | Debe implementarse en todo el Mundo, esta es una enfermedad maldita. Aunque Gracias a ella Dios me dio un Hermoso hijo que estuvo con nosotros durante 11 Belloos meses. Es la luz que guía mi camino.                                                                                                   |
| Other | Rare doesn't mean unimportant, period.                                                                                                                                                                                                                                                                   |

|       |                                                                                                                                                                                                                                                                                                                                                                                                                                 |
|-------|---------------------------------------------------------------------------------------------------------------------------------------------------------------------------------------------------------------------------------------------------------------------------------------------------------------------------------------------------------------------------------------------------------------------------------|
| Other | No baby or parent should have to be born with this disease.                                                                                                                                                                                                                                                                                                                                                                     |
| Other | Yes, no matter how much it cost. Our state shot it down in the house . Cause of founding issues.                                                                                                                                                                                                                                                                                                                                |
| Other | Some non mortal diseases are tested, why not this one which is particularly awful ??                                                                                                                                                                                                                                                                                                                                            |
| Other | Our response then was they would wait to see what other states did. There are more screening now, so it may be a better time.                                                                                                                                                                                                                                                                                                   |
| Other | We have fought and it is truly difficult to get state legislatures to mandate NBS for Krabbe. We got a law passed to mandate education about the availability of NBS tests, but that is a very small step. The largest argument is in the testing techniques, and what they consider “false positives” for carrier status vs actual affected status. It is a full time job to try and get our state to care about our children. |
| Other | NBS for Krabbe Disease should be implemented by every state and province in North America.                                                                                                                                                                                                                                                                                                                                      |
| Other | My daughter in law was part of the team that advocated for Illinois screening & it was passed in 2018                                                                                                                                                                                                                                                                                                                           |
| Other | We have tried twice in NH with no luck                                                                                                                                                                                                                                                                                                                                                                                          |

|       |                                                                                                                                                                                                                                                                                                                                                                                                                                                                                                                                                                                                                                                                                                                                                                                                                                                                                                                                                                                                                                                                                                                                                                                                                                                                  |
|-------|------------------------------------------------------------------------------------------------------------------------------------------------------------------------------------------------------------------------------------------------------------------------------------------------------------------------------------------------------------------------------------------------------------------------------------------------------------------------------------------------------------------------------------------------------------------------------------------------------------------------------------------------------------------------------------------------------------------------------------------------------------------------------------------------------------------------------------------------------------------------------------------------------------------------------------------------------------------------------------------------------------------------------------------------------------------------------------------------------------------------------------------------------------------------------------------------------------------------------------------------------------------|
| Other | Every child should be screened at birth, it should not depend on what state you live in as to if your child is screened for Krabbe or any disease for that matter!!                                                                                                                                                                                                                                                                                                                                                                                                                                                                                                                                                                                                                                                                                                                                                                                                                                                                                                                                                                                                                                                                                              |
| Other | I am currently advocating Newborn Screening for Krabbe Disease in NC                                                                                                                                                                                                                                                                                                                                                                                                                                                                                                                                                                                                                                                                                                                                                                                                                                                                                                                                                                                                                                                                                                                                                                                             |
| Other | There should be an option to check for all diseases, for every child.                                                                                                                                                                                                                                                                                                                                                                                                                                                                                                                                                                                                                                                                                                                                                                                                                                                                                                                                                                                                                                                                                                                                                                                            |
| Other | No child or family should have to go through what we and our son went through. And are still going through.                                                                                                                                                                                                                                                                                                                                                                                                                                                                                                                                                                                                                                                                                                                                                                                                                                                                                                                                                                                                                                                                                                                                                      |
| Other | It would be great this to added in Greece too. However, I think that never will be done.                                                                                                                                                                                                                                                                                                                                                                                                                                                                                                                                                                                                                                                                                                                                                                                                                                                                                                                                                                                                                                                                                                                                                                         |
| Other | <p>When our son was born in 2011, we, as a community, were asking this very question. For the duration of his 7-year, non-transplanted life, we continued to ask it. One-and-half-years after his death, here we are still. Meanwhile, more states have added NBS for Krabbe Leukodystrophy to their panel: seven are currently screening for Krabbe Disease while five more have passed legislation.</p> <p>Why stop to contemplate whether newborn screening for Krabbe Disease should be implemented in every state when it's already happening. I realize New York, Missouri, Kentucky, Tennessee, Illinois, New Jersey, Ohio, New Mexico, Pennsylvania, Louisiana, Indiana and South Carolina vs. the remaining thirty-eight states hardly constitutes a tipping point, but this question holds us back, keeps us from valuing the progress we have made.</p> <p>When I review the criteria that governs the classic argument on whether or not to screen for an illness, in the case of Krabbe Disease, yes, the cart was put before the horse, and it has proven beneficial. We now use elevated psychosine values as evidence of disease progression before symptoms present. This simple blood draw eliminates the need for an extensive battery of</p> |



|       |                                                                                                                                                                                                                                                                                                                                                                                                                                                                                                                                                                                                                                                                                                                                                                                                                                                                                                                                                                                                                                                                                               |
|-------|-----------------------------------------------------------------------------------------------------------------------------------------------------------------------------------------------------------------------------------------------------------------------------------------------------------------------------------------------------------------------------------------------------------------------------------------------------------------------------------------------------------------------------------------------------------------------------------------------------------------------------------------------------------------------------------------------------------------------------------------------------------------------------------------------------------------------------------------------------------------------------------------------------------------------------------------------------------------------------------------------------------------------------------------------------------------------------------------------|
|       | <p>tests every six months for those children who have been identified through NBS but are asymptomatic. A new generation of children have been transplanted experiencing gains in quality of life that can now replace the 10-year-old, outdated, data that so frequently gets cited by our critics. We have a published consensus of guidelines for the newborn screening, diagnosis and treatment of Infantile Krabbe Disease that can "guide public health laboratories on methodologies for screening and inform clinicians about the need to promptly diagnose and treat infantile Krabbe disease."</p> <p>On a personal level, as a mother of a deceased child, I will always have wanted more for my son: a successful transplant, of course, yes, nothing less! But until there is a cure or a prevention, there will always be shortcomings and misgivings. This is human nature. From the standpoint of the larger picture however, we have made significant strides in a short period of time even if the larger medical community keeps telling us we are doing it all wrong!</p> |
| Other | States that don't screen, id love to ask each member of the NBS board if it would matter if their child was diagnosed with Krabbe                                                                                                                                                                                                                                                                                                                                                                                                                                                                                                                                                                                                                                                                                                                                                                                                                                                                                                                                                             |
| Other | I testified in front of the Ohio State House to implement it. I've also written term papers for my Bachelor's degree on it.                                                                                                                                                                                                                                                                                                                                                                                                                                                                                                                                                                                                                                                                                                                                                                                                                                                                                                                                                                   |
| Other | Barbra Boxer told us to get lost!                                                                                                                                                                                                                                                                                                                                                                                                                                                                                                                                                                                                                                                                                                                                                                                                                                                                                                                                                                                                                                                             |
| Other | so many baby are going threw so much. And it breaks my heart                                                                                                                                                                                                                                                                                                                                                                                                                                                                                                                                                                                                                                                                                                                                                                                                                                                                                                                                                                                                                                  |

|                           |                                                                                                                                                                                                                                                                                                                                                                                                                                                                                                                                                                                                                                    |
|---------------------------|------------------------------------------------------------------------------------------------------------------------------------------------------------------------------------------------------------------------------------------------------------------------------------------------------------------------------------------------------------------------------------------------------------------------------------------------------------------------------------------------------------------------------------------------------------------------------------------------------------------------------------|
| Parental Rights/Knowledge | Every child should be screened - regardless of history. I was adopted and had no medical history and no way of knowing I was a carrier. It was too late for my daughter when we learned she had the disease. Not to mention that many in the medical field are unfamiliar with this disease, the symptoms and the rapid progression so when diagnosed it is often too late to do anything for the affected child.                                                                                                                                                                                                                  |
| Parental Rights/Knowledge | Every parent deserves the chance to fight for their child's life and quality of life. We were robbed of that ability due to the lack of education in the medical community that attempted to diagnose our son. We were going to be referred to the NIH: Undiagnosed Diseases Program but had to run 2 more genetic tests before we could apply. The very last genetic test showed one deletion on my side and from there the doctors decided to run a lysosomal enzyme function test that proved he had too little GALC in his system confirming the diagnosis of Krabbe along with one minor spelling change in my husband's DNA. |
| Parental Rights/Knowledge | No one should have to go through what we did, especially the emotions of finding out that had it been caught at birth we could have tried to save her life. THAT was the worst part of the entire diagnosis reveal. Not screening for Krabbe at birth robs parents of the right to TRY to save their child's life. That right should rest in the hands of parents, not the government. That's why we fight for improved NBS in our state, and we will continue to support families in other states until every baby has the same chance at a healthy life.                                                                         |
| Parental Rights/Knowledge | I believe that all states and other countries should have NBS. No parent should ever have to wonder if they are doing something right. My child has Krabbe and it took us until she was 5 months old to get diagnosed. It's so devastating. We never thought that or imagined our life would be like this at all.                                                                                                                                                                                                                                                                                                                  |
| Parental Rights/Knowledge | I believe parents should have the information needed to make an appropriate decision of what would be best for their family/child.                                                                                                                                                                                                                                                                                                                                                                                                                                                                                                 |
| Parental Rights/Knowledge | Newborn screening give families a choice. With the advances in medicine, we as parents deserve to know before it's too late to do anything. We did not have a choice with our son but had he been screened at birth, his outcome could possibly have been different.                                                                                                                                                                                                                                                                                                                                                               |
| Parental Rights/Knowledge | In my way, newborn screening for krabbe disease should be implemented because nowadays, krabbe, is much more commun and it is so letal!<br>Everyone should know if the newborn has or not krabbe disease!                                                                                                                                                                                                                                                                                                                                                                                                                          |

|                           |                                                                                                                                                                                                                                                                                                                                                                                                     |
|---------------------------|-----------------------------------------------------------------------------------------------------------------------------------------------------------------------------------------------------------------------------------------------------------------------------------------------------------------------------------------------------------------------------------------------------|
| Parental Rights/Knowledge | I never knew the word krabbe until last February when we found out our grandson has it. I don't want any family to lose a child to this horrid disease. I want parents to have options rather than hear the words go home, love him and watch him die.                                                                                                                                              |
| Parental Rights/Knowledge | Giving multiple children a better quality of life is all I can ask for. No one should go through what I went through, watching and then losing a child with Krabbe. Parents should be given a better choice than what I was given and early detection is the only way to do this. We need to provide knowledge for these families.                                                                  |
| Parental Rights/Knowledge | Newborn screening is very very important for the parents, to give them some control of this terrified disease                                                                                                                                                                                                                                                                                       |
| Parental Rights/Knowledge | Parents shouldn't have to go through 6 or more months of agony wondering what is wrong with their child, what they could have done differently. Or if you are missing something and you are not fixing it soon enough.                                                                                                                                                                              |
| Parental Rights/Knowledge | NBS is about giving the families an option before it is too late. The family does not have to transplant but the information is critical if that is the option they choose. Less importance on false positives is necessary. I would rather be scared for a few weeks then miss an opportunity of life saving treatment from no testing at all. My son could be walking if he was born in New York! |
| Parental Rights/Knowledge | I believe that parents need to have access to any and all newborn screening panels and if they choose not to participate then that is their choice. but I believe it needs to be known for parents that aren't aware that there is other testing that can be done that the state doesn't require.                                                                                                   |
| Parental Rights/Knowledge | No parent should have to go through what my family went through because they did not know the signs and symptoms of Krabbe Disease.                                                                                                                                                                                                                                                                 |
| Parental Rights/Knowledge | Not having the chance to be educated until after the fact is not only a twisted misuse of power but also grave injustice by the state legislature.                                                                                                                                                                                                                                                  |
| Parental Rights/Knowledge | It will save so many parents from the pain and agony of losing a child and parents should have a right to know if their newborn has this rare disease or not. The babies should have a chance to live a long life and not suffer in pain.                                                                                                                                                           |
| Parental Rights/Knowledge | Every child and their parents have the right to know if they are carriers and about Krabbe's disease                                                                                                                                                                                                                                                                                                |

|                           |                                                                                                                                                                                                                                                                                                                                                                                                                                                                                                |
|---------------------------|------------------------------------------------------------------------------------------------------------------------------------------------------------------------------------------------------------------------------------------------------------------------------------------------------------------------------------------------------------------------------------------------------------------------------------------------------------------------------------------------|
| Parental Rights/Knowledge | You cannot control or manage what you dont know. Rather find out sooner than later.                                                                                                                                                                                                                                                                                                                                                                                                            |
| Parental Rights/Knowledge | Every parent should know at the earliest possible date whether their child has Krabbe to minimise the effect of the disease.                                                                                                                                                                                                                                                                                                                                                                   |
| Parental Rights/Knowledge | I never new the true cause of my daughter's illness till 3 days before her death and then they could not tell me the type of leukodystrophy till after special testing on her brain tissue, which came back known as Krabbe disease                                                                                                                                                                                                                                                            |
| Parental Rights/Knowledge | It was very rare and I didn't have any idea about Krabbe, I believe that if my baby girl would have been screened for that she would have live longer                                                                                                                                                                                                                                                                                                                                          |
| Parental Rights/Knowledge | Every state should test, it's the right of the parents and the baby to know and decide on best treatment plan before it's too late.                                                                                                                                                                                                                                                                                                                                                            |
| Parental Rights/Knowledge | It gives any Krabbe child an opportunity at life because it is invisible at birth and you think you are taking home a healthy baby (especially after screening with other newborn tests)                                                                                                                                                                                                                                                                                                       |
| Parental Rights/Knowledge | This is about families having options. No legislator or scientist's opinion matters - families should have the right to intervene with current treatments if they desire and this should not be decided by anyone else but the parents. For this reason I support newborn screening for Krabbe in all states to preserve this option that I feel is a right to improve the life of their child. Forget about the opinions of scientists and doctors that don't have children with the disease. |
| Save/Protect Lives        | If diagnosed in time you can save lives!                                                                                                                                                                                                                                                                                                                                                                                                                                                       |
| Save/Protect Lives        | It could have save my grandson's life.                                                                                                                                                                                                                                                                                                                                                                                                                                                         |
| Save/Protect Lives        | We were able to get new born screening passed in Ohio. Every child deserves a chance to live.                                                                                                                                                                                                                                                                                                                                                                                                  |
| Save/Protect Lives        | This should be done to protect children from the horrible suffering and lack of information.                                                                                                                                                                                                                                                                                                                                                                                                   |
| Save/Protect Lives        | It would have saved my daughters life                                                                                                                                                                                                                                                                                                                                                                                                                                                          |

|                    |                                                                                                                                                                                                                                                                                                                                                                                                                                                                                                                                                                                                |
|--------------------|------------------------------------------------------------------------------------------------------------------------------------------------------------------------------------------------------------------------------------------------------------------------------------------------------------------------------------------------------------------------------------------------------------------------------------------------------------------------------------------------------------------------------------------------------------------------------------------------|
| Save/Protect Lives | IF POSSIBLE., WHY NOT SAVE EVERY CHILD FROM THIS HORRIBLE DISEASE                                                                                                                                                                                                                                                                                                                                                                                                                                                                                                                              |
| Save/Protect Lives | The argument I hear from doctors in our state is that there is unnecessary stress that comes with false positives. I also heard that research isn't far enough to help the children so there is no cure and no hope. State leaders/doctors on the board who make the calls need to be better educated and understand that there is hope and there is treatment and there are options for kids who are tested and diagnosed at birth. It would have given our child a chance. Unnecessary stress is welcomed as a Krabbe parent if it helps save even one life - or extend the quality of life. |
| Save/Protect Lives | Had we known she had desease we could have taken proper steps to save our daughter's life!                                                                                                                                                                                                                                                                                                                                                                                                                                                                                                     |
| Save/Protect Lives | No child or parent should ever have to endure the pain and suffering Krabbe brings without a chance at life                                                                                                                                                                                                                                                                                                                                                                                                                                                                                    |
| Save/Protect Lives | Earlier the detection, the better results                                                                                                                                                                                                                                                                                                                                                                                                                                                                                                                                                      |
| Save/Protect Lives | Every child not tested at birth is living with a death sentence. We have the technology, we need to use it. Putting these children (and parents) through the pain of life with Krabbe is inhumane.                                                                                                                                                                                                                                                                                                                                                                                             |
| Save/Protect Lives | Absolutely, every state should implement newborn screening for Krabbe. Why would you not, if there is a process that can save a child's life?                                                                                                                                                                                                                                                                                                                                                                                                                                                  |
| Save/Protect Lives | While it would not have saved her life, we could have been prepared for when the symptoms started instead of her almost starving and suffering for months before the diagnosis                                                                                                                                                                                                                                                                                                                                                                                                                 |
| Save/Protect Lives | Had we known she had desease we could have taken proper steps to save our daughter's life!                                                                                                                                                                                                                                                                                                                                                                                                                                                                                                     |
| Save/Protect Lives | If they tested here in UK we could of had longer time and better quality of life for him                                                                                                                                                                                                                                                                                                                                                                                                                                                                                                       |

|                    |                                                                                                                                                                                                                                               |
|--------------------|-----------------------------------------------------------------------------------------------------------------------------------------------------------------------------------------------------------------------------------------------|
| Save/Protect Lives | My daughter would have at least been given a chance at life.                                                                                                                                                                                  |
| Save/Protect Lives | A poke can save a life and family from devastating circumstances and so much sadness                                                                                                                                                          |
| Save/Protect Lives | A simple blood draw could have saved my son's life. Why wouldn't we test if it could save a life.                                                                                                                                             |
| Save/Protect Lives | I would like to see more children screened to save lives                                                                                                                                                                                      |
| Save/Protect Lives | My nephew's life could possibly have been saved through newborn screening or he may have suffered less because his parents would have known he had KRABBE before he started showing symptoms. He suffered for months before they had answers. |
| Save/Protect Lives | All lives matter.                                                                                                                                                                                                                             |

|                    |                                                                                                                                                                                                                                                                                                                                                                                                                            |
|--------------------|----------------------------------------------------------------------------------------------------------------------------------------------------------------------------------------------------------------------------------------------------------------------------------------------------------------------------------------------------------------------------------------------------------------------------|
| Save/Protect Lives | My child should have been given a chance at life and not the suffering she went through because she was not screened properly.                                                                                                                                                                                                                                                                                             |
| Save/Protect Lives | My son's life could have been saved if he was screened at birth. Even if there wasn't a viable treatment option- knowing he had a fatal disease would have saved us so much money from medical testing and lessened his suffering to get him on the correct medication.                                                                                                                                                    |
| Save/Protect Lives | If by implementing a simple blood test that could save many lives then we should fight to have it in every state.                                                                                                                                                                                                                                                                                                          |
| Save/Protect Lives | No child should have to go through anything, like Krabbe, if there is a chance to detect it at birth to help give a chance of life.                                                                                                                                                                                                                                                                                        |
| Save/Protect Lives | NBS CAN save lives, or at least give our children a better quality of life for a longer period.                                                                                                                                                                                                                                                                                                                            |
| Save/Protect Lives | Every baby deserves a Krabbe free life                                                                                                                                                                                                                                                                                                                                                                                     |
| Save/Protect Lives | I believe every child in the world should be tested at birth, they deserve it. It's all we have until a cure for this terrible disease has been found....                                                                                                                                                                                                                                                                  |
| Save/Protect Lives | Krabbe disease is the worst nightmare a family can ever have. Watching your beautiful baby suffer as the disease progresses doesn't come close to the physical pain that they endure. Almost all of the babies diagnosed are given a death sentence because once symptomatic, there is nothing that can be done. We will never be the same again. Our family is broken and lost without our little girl. She is so missed. |
| Save/Protect Lives | My son would still be alive or atleast had a chance to live.                                                                                                                                                                                                                                                                                                                                                               |

|                    |                                                                                                                                                                                                                                                                                                                                                                                                                                                                                                                                                                                                                                                                                                                                                                                                                                                                                              |
|--------------------|----------------------------------------------------------------------------------------------------------------------------------------------------------------------------------------------------------------------------------------------------------------------------------------------------------------------------------------------------------------------------------------------------------------------------------------------------------------------------------------------------------------------------------------------------------------------------------------------------------------------------------------------------------------------------------------------------------------------------------------------------------------------------------------------------------------------------------------------------------------------------------------------|
| Save/Protect Lives | My nephew was diagnosed with Krabbe Disease at 6 months old. Knowing that a newborn screening could have saved his life motivates myself and our family to fight for this so that no other family has to go through this devastating experience.                                                                                                                                                                                                                                                                                                                                                                                                                                                                                                                                                                                                                                             |
| Save/Protect Lives | Newborn Screening should be provided in every state, because these babies deserve the best chance at life!                                                                                                                                                                                                                                                                                                                                                                                                                                                                                                                                                                                                                                                                                                                                                                                   |
| Save/Protect Lives | This must be done to save newborn babies from developing this disease.                                                                                                                                                                                                                                                                                                                                                                                                                                                                                                                                                                                                                                                                                                                                                                                                                       |
| Save/Protect Lives | É muito importante e urgente fazer-se o teste! É a única forma de salvar uma vida! Nada paga a dor e a vida dos nossos filhos!                                                                                                                                                                                                                                                                                                                                                                                                                                                                                                                                                                                                                                                                                                                                                               |
| Save/Protect Lives | Simple: It can save lives!!! Our son did not show symptoms until 3 years old. If Georgia had newborn screening we could have given him a transplant before he showed symptoms.                                                                                                                                                                                                                                                                                                                                                                                                                                                                                                                                                                                                                                                                                                               |
| Save/Protect Lives | <p>I know the transplant isn't an easier option. I know it requires chemo, time spent in the hospital, more testing and monitoring, but the odds of a child still being here and having a better quality life improve with the transplant. I know my child would still be able to see me, smile at me, and be a part of our ordinary everyday lives. He would still be here.</p> <p>Even if we didn't want to go through the transplant option, we could have been prepared with the appropriate medications and equipment with the knowledge of his disease at birth. He wouldn't have had to suffer for 3 months as we figured out what was wrong with him and how to treat his symptoms. We wouldn't have had to go to the doctors 4 times and spend a week in the hospital as the ran every type of diagnostic test. We could have been prepared and saved him additional suffering.</p> |
| Save/Protect Lives | This disease is horrible, and after it settles in there is nothing that can be done. The time is at birth - that is the only time that they have a chance to fight it. We owe it to our children to give them the best chance they can have.                                                                                                                                                                                                                                                                                                                                                                                                                                                                                                                                                                                                                                                 |



|                        |                                                                                                                                                                                                                                                                                                                                                                                                                                                                                                                                                                                      |
|------------------------|--------------------------------------------------------------------------------------------------------------------------------------------------------------------------------------------------------------------------------------------------------------------------------------------------------------------------------------------------------------------------------------------------------------------------------------------------------------------------------------------------------------------------------------------------------------------------------------|
| Save/Protect Lives     | eVERYCHULD                                                                                                                                                                                                                                                                                                                                                                                                                                                                                                                                                                           |
| Save/Protect Lives     | No one should suffer with those disease.                                                                                                                                                                                                                                                                                                                                                                                                                                                                                                                                             |
| Save/Protect Lives     | If these diseases were screened for at birth, many lives could be saved. They would suffer less and have far more quality of life.                                                                                                                                                                                                                                                                                                                                                                                                                                                   |
| Save/Protect Lives     | If we have the ability to detect for Krabbe at birth, we should be doing that as it can be a lifesaving test that can easily be done with other newborn testing already being done at birth.                                                                                                                                                                                                                                                                                                                                                                                         |
| Save/Protect Lives     | I think it could save lives by screening them                                                                                                                                                                                                                                                                                                                                                                                                                                                                                                                                        |
| Treatment Intervention | Including krabbe Testing in every newborn screening will help quick intervention for those who may have the disease..                                                                                                                                                                                                                                                                                                                                                                                                                                                                |
| Treatment Intervention | Early detection would have allowed my daughter to receive treatments before the symptoms were too great.                                                                                                                                                                                                                                                                                                                                                                                                                                                                             |
| Treatment Intervention | My feelings regarding NBS range from angry and hurting to simply confused. I lost my child to a disease that could have been treated, if only I had known. I feel the country is negligent in not screening for all diseases. They give false hope that a child is being protected (when they screen for only a few diseases and not all). In Arizona 39 of the 66. The excuse of " lack of funding and false positives" makes my blood boil. Quite simply, I find it derelict that the US government does not protect life after birth, when the technologies exist to do so today. |
| Treatment Intervention | All family's have an right to choose to be transplanted or not                                                                                                                                                                                                                                                                                                                                                                                                                                                                                                                       |
| Treatment Intervention | This should be tested in the newborn screening so that there could be a chance of transplant to prolong life or stop the disease                                                                                                                                                                                                                                                                                                                                                                                                                                                     |

|                        |                                                                                                                                                                                                                                                                                                                                                                                                                                                                                                                                                                                                                                                                                                                      |
|------------------------|----------------------------------------------------------------------------------------------------------------------------------------------------------------------------------------------------------------------------------------------------------------------------------------------------------------------------------------------------------------------------------------------------------------------------------------------------------------------------------------------------------------------------------------------------------------------------------------------------------------------------------------------------------------------------------------------------------------------|
| Treatment Intervention | I would have liked to have been given the choice of a transplant at birth, instead of being told after symptoms presented themselves that there was nothing that could be done.                                                                                                                                                                                                                                                                                                                                                                                                                                                                                                                                      |
| Treatment Intervention | Krabbe disease isn't as rare as many may think and the progression is devastating. Every state should implement the testing for Krabbe on the newborn screening because there is treatment available if caught at birth. This would at least give families a chance to do everything they can to improve their child's quality of life and even save their life. My daughter was never given that chance and she suffered her whole short 18 month life. My daughter passed away right after the state of IL implemented Krabbe screening. She is a hero in the state of IL, but also nation wide. Please give other kiddos a chance at life. Too many have passed without even being diagnosed and it's just awful. |
| Treatment Intervention | IF THE NEW BORN SCREENING WILL HELP WITH A CORD BLOOD TRANSPLANT IT CERTAINLY WOULD BE WORTH IT.                                                                                                                                                                                                                                                                                                                                                                                                                                                                                                                                                                                                                     |
| Treatment Intervention | The prevention of symptoms and even death could be the result of newborn screening. Our son would still be living.                                                                                                                                                                                                                                                                                                                                                                                                                                                                                                                                                                                                   |
| Treatment Intervention | I would hope that if we had had early screening, we could have taken advantage of transplant services. Our son was too old and they felt too far progressed.                                                                                                                                                                                                                                                                                                                                                                                                                                                                                                                                                         |
| Treatment Intervention | Early intervention is the only medical hope!                                                                                                                                                                                                                                                                                                                                                                                                                                                                                                                                                                                                                                                                         |
| Treatment Intervention | It is the only chance to treat/cure.                                                                                                                                                                                                                                                                                                                                                                                                                                                                                                                                                                                                                                                                                 |
| Treatment Intervention | Every newborn should be tested for any and all screenable and treatable diseases.                                                                                                                                                                                                                                                                                                                                                                                                                                                                                                                                                                                                                                    |
| Treatment Intervention | Although there is also no cure for Cancer, there are treatments. And like Cancer when diagnosed early, you have choices. That's all I ask for with Krabbe. Both diseases are terminal when not diagnosed early enough and there is no screening at birth to say you'll have Cancer, but there is for Krabbe. Give the parents the opportunity to save their children's lives.                                                                                                                                                                                                                                                                                                                                        |
| Treatment Intervention | More accurate statistics of people effected with the disease. If detected early treatment can be given                                                                                                                                                                                                                                                                                                                                                                                                                                                                                                                                                                                                               |

|                        |                                                                                                                                                                                                                                                                                                                                                                                                                                                                                                                                                                                                                                                                                                                                                                                                                                                                                                                                                                                                                                                                                                                                                                                                                                                                                                                                                                                                                                                                                                                                                                                          |
|------------------------|------------------------------------------------------------------------------------------------------------------------------------------------------------------------------------------------------------------------------------------------------------------------------------------------------------------------------------------------------------------------------------------------------------------------------------------------------------------------------------------------------------------------------------------------------------------------------------------------------------------------------------------------------------------------------------------------------------------------------------------------------------------------------------------------------------------------------------------------------------------------------------------------------------------------------------------------------------------------------------------------------------------------------------------------------------------------------------------------------------------------------------------------------------------------------------------------------------------------------------------------------------------------------------------------------------------------------------------------------------------------------------------------------------------------------------------------------------------------------------------------------------------------------------------------------------------------------------------|
| Treatment Intervention | Newborn screening gives our children a chance to receive treatment before becoming symptomatic!                                                                                                                                                                                                                                                                                                                                                                                                                                                                                                                                                                                                                                                                                                                                                                                                                                                                                                                                                                                                                                                                                                                                                                                                                                                                                                                                                                                                                                                                                          |
| Treatment Intervention | It is important because if the disease is diagnosed immediately it can be transplanted                                                                                                                                                                                                                                                                                                                                                                                                                                                                                                                                                                                                                                                                                                                                                                                                                                                                                                                                                                                                                                                                                                                                                                                                                                                                                                                                                                                                                                                                                                   |
| Treatment Intervention | Newborn screening is the only hope for life-saving treatment.                                                                                                                                                                                                                                                                                                                                                                                                                                                                                                                                                                                                                                                                                                                                                                                                                                                                                                                                                                                                                                                                                                                                                                                                                                                                                                                                                                                                                                                                                                                            |
| Treatment Intervention | The earlier it's diagnosed, the sooner treatment can be started                                                                                                                                                                                                                                                                                                                                                                                                                                                                                                                                                                                                                                                                                                                                                                                                                                                                                                                                                                                                                                                                                                                                                                                                                                                                                                                                                                                                                                                                                                                          |
| Treatment Intervention | <p>I believe that all children should be tested for krabbe at birth or even while in the mother's womb, if possible, to be prepared for bone marrow transplant as soon as possible. It is possible that bone marrow transplant could even be done on the child while still in utero by removing the fetus, operating, and placing the fetus back into the womb. It has been proven that krabbe begins to effect children while in utero. I find myself asking if there were more anatomy scans/ultra sounds than just one we would have caught the demylenation of my Daughter! I really wanted them to do another and I should have asked for one. But since it wasn't, "normal," protocol I did not. I believed my Baby was going to be perfectly healthy. I don't really understand why more ultrasounds are not necessary during pregnancy. It seems western medicine is very reactive instead of proactive. To save lives we need to be proactive. So now knowing that my Husband and I are carriers there are more options for us and I believe I will be monitored more closely. Why was I not given that option for my first pregnancy. I know numbers show that most children are born perfectly fine but that is not always the case and we as a country need to be prepared to help these innocent babies anyway we can. Needless to say if krabbe would have been on the NBS panel in SC we could have possibly saved my daughter's life. Just saying those words is heart wrenching. I constantly pray for a cure for krabbe and I know that the God I serve is able to</p> |

|                        |                                                                                                                                                                                                                                                                                                                                                                                     |
|------------------------|-------------------------------------------------------------------------------------------------------------------------------------------------------------------------------------------------------------------------------------------------------------------------------------------------------------------------------------------------------------------------------------|
|                        | do exceedingly above all that I could ever ask or think of Him! Leaning on his promises helps us get through this nightmare we call life.                                                                                                                                                                                                                                           |
| Treatment Intervention | Early diagnosis is critical for a child to receive a blood chord transplant                                                                                                                                                                                                                                                                                                         |
| Treatment Intervention | Krabbe is a devastating disease which causes babies to suffer and die. If this can be avoided and if treatment is available, newborn screening should be done                                                                                                                                                                                                                       |
| Treatment Intervention | If NBS was available in Ohio when my son was born he could have been treated prior to onset of symptoms.                                                                                                                                                                                                                                                                            |
| Treatment Intervention | I said yes, mainly for being able to catch (hopefully) those late infantile cases. I struggle with wishing I had more options for a longer better life for my child, yet knowing that the likely quality of life my child would have had with a transplant is nothing I would want for him or myself in his place. In the immediate grief phase I would have wanted the transplant. |
| Treatment Intervention | All disease that are screenable and treatable MUST be tested.                                                                                                                                                                                                                                                                                                                       |

|                        |                                                                                                                                                                                                                                                                                         |
|------------------------|-----------------------------------------------------------------------------------------------------------------------------------------------------------------------------------------------------------------------------------------------------------------------------------------|
| Treatment Intervention | <p>We fight for every kind of disease known to children. Like vaccines and cancer treatments and rare diseases. So why not Krabbe. Why is it that difficult to implement a screening at or before birth to survive a child from a difficult journey?</p> <p>Makes no logical sense.</p> |
| Treatment Intervention | <p>If we knew about Krabbe my son could have received a cord blood transplant like his younger brother did. It could have saved his life.</p>                                                                                                                                           |
| Treatment Intervention | <p>So that each child has the opportunity for treatment and a better quality of life</p>                                                                                                                                                                                                |
| Treatment Intervention | <p>I would want to see a more advanced, kinder treatment than a transplant and I hope research will achieve this. I believe newborn screening should be available to all.</p>                                                                                                           |
| Treatment Intervention | <p>I believe every person with this disease should have the option to have treatment as soon as possible so that they don't have to suffer a horrible death.</p>                                                                                                                        |
| Treatment Intervention | <p>To try and treat if possible before symptoms</p>                                                                                                                                                                                                                                     |
| Treatment Intervention | <p>In South Africa newborns aren't currently screened, resulting in misdiagnosis and untimely deaths and no treatment for those affected by it.</p>                                                                                                                                     |
| Treatment Intervention | <p>Early detection equals early treatment</p>                                                                                                                                                                                                                                           |
| Treatment Intervention | <p>Would help with diagnosis of disease</p>                                                                                                                                                                                                                                             |
| Treatment Intervention | <p>If we had known our child had Krabbe disease at birth, he would have been transplanted and most likely have no symptoms.</p>                                                                                                                                                         |
| Treatment Intervention | <p>I wish I had received my child's diagnosis earlier so that she could have been transplanted earlier, had fewer complications, and lived a longer, happier, and less painful life.</p>                                                                                                |

|                           |                                                                                                                                                                    |
|---------------------------|--------------------------------------------------------------------------------------------------------------------------------------------------------------------|
| Treatment Intervention    | It is imperative for early detection , to assure proper treatment.                                                                                                 |
| Treatment Intervention    | It's imperative for children to be screened at birth for Krabbe disease so they can have effective treatment.                                                      |
| Treatment Intervention    | This can help early detection and quick intervention if transplant is required                                                                                     |
| Treatment Intervention    | Of course! Over the years we've witnessed many children who were successfully transplanted. You can't put a price on extending and/or improving your child's life. |
| Treatment Intervention    | early diagnosis may help - may give opportunity to some. access to medical assistance is also paramount                                                            |
| Parental Rights/Knowledge | It makes it understandable for parents at the begining of infant life                                                                                              |

#### FHD Group

|                    |                                                                      |
|--------------------|----------------------------------------------------------------------|
| Other              | it must be a must!                                                   |
| Save/Protect Lives | Help to save life's                                                  |
| Save/Protect Lives | Yes it can save lives                                                |
| save/Protect Lives | I am currently advocating Newborn Screening for Krabbe Disease in NC |

|                        |                                                                                                                                                                                                                                                                                                    |
|------------------------|----------------------------------------------------------------------------------------------------------------------------------------------------------------------------------------------------------------------------------------------------------------------------------------------------|
| Save/Protect Lives     | Ya to save lives                                                                                                                                                                                                                                                                                   |
| Treatment Intervention | Yes I do so children can get the proper care as soon as possible                                                                                                                                                                                                                                   |
| Treatment Intervention | All treatable and screenable diseases should be tested                                                                                                                                                                                                                                             |
| Treatment Intervention | Every child deserves a chance at life, with or without limitations. Considering there is available testing and treatment, it should be no question. It is inhumane, in my opinion, to allow so many to go undetected and suffer unnecessarily while their parents endure the “diagnostic odyssey.” |
| Treatment Intervention | It’s important for babies to be tested at birth so they can receive treatments right away.                                                                                                                                                                                                         |
| Treatment Intervention | So that each child has the opportunity for treatment and a better quality of life                                                                                                                                                                                                                  |
| Treatment Intervention | Its imperative for children to be diagnosed at birth in order to receive treatment.                                                                                                                                                                                                                |
| Treatment Intervention | A child can be saved by getting a quick diagnosis of Krabbe, so I would support newborn screening if it can return a result within a few days because receiving the cord blood transplant as soon as possible is vital to the child's future prospects.                                            |
